# Supplementary material for: Vaccination with immunotherapeutic Listeria monocytogenes induces IL-17+ γδ T cells in a murine model for HPV associated cancer
Source: PubMed Central journal article supplement — Oncoimmunology. 2012 Sep 1;1(6):822–8. doi: 10.4161/onci.20491 (PMC3489737; doi:10.4161/onci.20491), 2012-09-01
Supplement: onci-1-822-s01.pdf [file onci-1-822-s01.pdf]

Supplementary Material to:

**Vaccination with immunotherapeutic *Listeria monocytogenes* induces IL-17+  $\gamma\delta$  T cells in a murine model for HPV associated cancer**

Patrick D. Guirnalda and Yvonne Paterson

OncoImmunology 2012: 1(7); DOI: 10.4161.20491

<http://www.landesbioscience.com/journals/oncoimmunology/article/20491>

**A**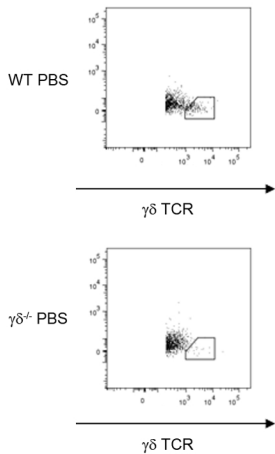**B**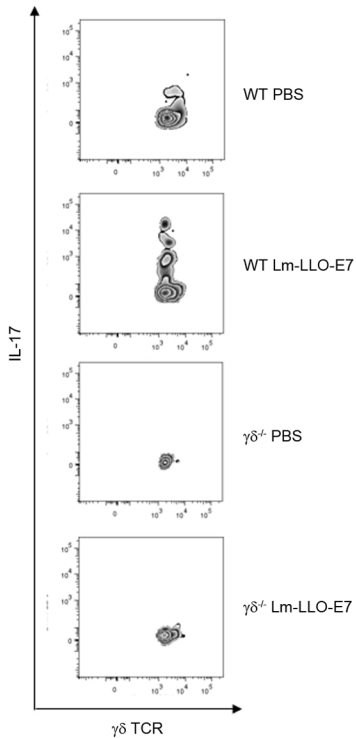

Figure S1. Analysis of spleens from WT and  $\gamma\delta$  TCR deficient mice (Panel A) confirmed that vaccination with Lm-LLO-E7 failed to induce IL-17<sup>+</sup>,  $\gamma\delta$  T cells in  $\gamma\delta$  T cell deficient transgenic mice examined in the study (Panel B). Representative FACs plots are shown.
